# Supplementary material
Source: Springer Nature journal article supplement (https://www.springermedizin.de/resource/supplementary/12889_2012_4689_MOESM7_ESM.pdf/9493212)
Supplement: MOESM7 [file 9493212]

Table 4 - Underlying causes-of-death in deaths that included anortic aneurysm and dissection as na associated (non-underlying) cause-of-death, State of São Paulo, 1985-2009

| Underlying causes of death (ICD-9) (ICD-10)                                                     | Aortic aneurysm and dissection as associated (non-underlying) cause-of-death |               |                    |               |                 |               |             |               |
|-------------------------------------------------------------------------------------------------|------------------------------------------------------------------------------|---------------|--------------------|---------------|-----------------|---------------|-------------|---------------|
|                                                                                                 | Dissection                                                                   |               | Ruptured aneurysms |               | Without rupture |               | Total       |               |
|                                                                                                 | n                                                                            | %             | n                  | %             | n               | %             | n           | %             |
| <b>Certain infectious and parasitic diseases (001-138) (A00-B99)</b>                            | <b>23</b>                                                                    | <b>3.16</b>   | <b>14</b>          | <b>1.20</b>   | <b>122</b>      | <b>2.63</b>   | <b>159</b>  | <b>2.44</b>   |
| Septicemias (038) (A40-A41)                                                                     | 12                                                                           | 1.65          | 7                  | 0.60          | 54              | 1.17          | 73          | 1.12          |
| Chagas' disease (086) (B57)                                                                     | 3                                                                            | 0.41          | 5                  | 0.43          | 19              | 0.41          | 27          | 0.41          |
| <b>Neoplasms (140-239) (C00-D48)</b>                                                            | <b>21</b>                                                                    | <b>2.88</b>   | <b>46</b>          | <b>3.95</b>   | <b>442</b>      | <b>9.54</b>   | <b>509</b>  | <b>7.80</b>   |
| Malignant neoplasms of oesophagus (150) (C15)                                                   | 1                                                                            | 0.14          | 11                 | 0.94          | 91              | 1.96          | 103         | 1.58          |
| Malignant neoplasm of bronchus and lung (162.2-162.9) (C34)                                     | 5                                                                            | 0.69          | 7                  | 0.60          | 72              | 1.55          | 84          | 1.29          |
| <b>Endocrine, nutritional and metabolic diseases (240-279) (E00-E90)</b>                        | <b>19</b>                                                                    | <b>2.61</b>   | <b>76</b>          | <b>6.52</b>   | <b>131</b>      | <b>2.83</b>   | <b>226</b>  | <b>3.46</b>   |
| Diabetes mellitus (250) (E10-E14)                                                               | 8                                                                            | 1.10          | 41                 | 3.52          | 72              | 1.55          | 121         | 1.85          |
| <b>Diseases of the circulatory system (390-459) (I00-I99)</b>                                   | <b>469</b>                                                                   | <b>64.42</b>  | <b>621</b>         | <b>53.30</b>  | <b>2548</b>     | <b>54.98</b>  | <b>3638</b> | <b>55.74</b>  |
| Hypertensive diseases (401-404) (I10-I13)                                                       | 134                                                                          | 18.41         | 216                | 18.54         | 336             | 7.25          | 688         | 10.54         |
| Ischaemic heart diseases (410-414) (I20-I25)                                                    | 146                                                                          | 20.05         | 166                | 14.25         | 1067            | 23.03         | 1379        | 21.13         |
| Pulmonary heart diseases and diseases of pulmonary circulation (415-417) (I26-I28)              | 14                                                                           | 1.92          | 9                  | 0.77          | 65              | 1.40          | 88          | 1.35          |
| Cardiomyopathy (425) (I42)                                                                      | 18                                                                           | 2.47          | 26                 | 2.23          | 147             | 3.17          | 189         | 2.90          |
| Other cardiac arrhythmias (426-427) (I44-I49)                                                   | 6                                                                            | 0.82          | 11                 | 0.94          | 58              | 1.25          | 75          | 1.15          |
| Heart failure (428) (I50)                                                                       | 13                                                                           | 1.79          | 20                 | 1.72          | 148             | 3.19          | 181         | 2.77          |
| Other heart diseases (420-424, 429) (I30-I40, I51)                                              | 37                                                                           | 5.08          | 25                 | 2.15          | 161             | 3.47          | 223         | 3.42          |
| Cerebrovascular diseases (430-438) (I60-I69)                                                    | 67                                                                           | 9.20          | 108                | 9.27          | 387             | 8.35          | 562         | 8.61          |
| Atherosclerosis (440) (I70)                                                                     | 11                                                                           | 1.51          | 19                 | 1.63          | 71              | 1.53          | 101         | 1.55          |
| Other diseases of arteries, arterioles and capillaries (442-448) (I72-I78)                      | 15                                                                           | 2.06          | 12                 | 1.03          | 68              | 1.47          | 95          | 1.46          |
| <b>Diseases of the respiratory system (460-519) (J00-J99)</b>                                   | <b>74</b>                                                                    | <b>10.16</b>  | <b>129</b>         | <b>11.07</b>  | <b>696</b>      | <b>15.02</b>  | <b>899</b>  | <b>13.77</b>  |
| Pneumonias (480-486) (J12-J18)                                                                  | 31                                                                           | 4.26          | 44                 | 3.78          | 270             | 5.83          | 345         | 5.29          |
| Chronic lower respiratory diseases (490-496) (J40-J47)                                          | 21                                                                           | 2.88          | 52                 | 4.46          | 302             | 6.52          | 375         | 5.75          |
| <b>Diseases of the digestive system (520-579) (K00-K93)</b>                                     | <b>49</b>                                                                    | <b>6.73</b>   | <b>182</b>         | <b>15.62</b>  | <b>348</b>      | <b>7.51</b>   | <b>579</b>  | <b>8.87</b>   |
| Vascular disorders of intestine (557) (K55)                                                     | 3                                                                            | 0.41          | 19                 | 1.63          | 86              | 1.86          | 108         | 1.65          |
| Peritoneal adhesions (568.0) (K660)                                                             | 24                                                                           | 3.30          | 121                | 10.39         | 10              | 0.22          | 155         | 2.37          |
| <b>Diseases of the genitourinary system (580-629) (N00-N99)</b>                                 | <b>12</b>                                                                    | <b>1.65</b>   | <b>17</b>          | <b>1.46</b>   | <b>174</b>      | <b>3.75</b>   | <b>203</b>  | <b>3.11</b>   |
| Renal failure (584-586) (N17-N19)                                                               | 5                                                                            | 0.69          | 10                 | 0.86          | 118             | 2.55          | 133         | 2.04          |
| <b>Pregnancy, childbirth and the puerperium (630-676) (O00-O99)</b>                             | <b>4</b>                                                                     | <b>0.55</b>   | <b>3</b>           | <b>0.26</b>   | <b>1</b>        | <b>0.02</b>   | <b>8</b>    | <b>0.12</b>   |
| <b>Congenital malformations, deformations and chromosomal abnormalities (740-759) (Q00-Q99)</b> | <b>27</b>                                                                    | <b>3.71</b>   | <b>16</b>          | <b>1.37</b>   | <b>23</b>       | <b>0.50</b>   | <b>66</b>   | <b>1.01</b>   |
| Marfan's syndrome (Q87.4)                                                                       | 24                                                                           | 3.30          | 10                 | 0.86          | 18              | 0.39          | 52          | 0.80          |
| <b>External causes of morbidity and mortality (800-999) (V00-Y98)</b>                           | <b>11</b>                                                                    | <b>1.51</b>   | <b>43</b>          | <b>3.69</b>   | <b>41</b>       | <b>0.88</b>   | <b>95</b>   | <b>1.46</b>   |
| <b>Other underlying causes of death</b>                                                         | <b>19</b>                                                                    | <b>2.61</b>   | <b>18</b>          | <b>1.55</b>   | <b>108</b>      | <b>2.33</b>   | <b>145</b>  | <b>2.22</b>   |
| <b>Total</b>                                                                                    | <b>728</b>                                                                   | <b>100.00</b> | <b>1165</b>        | <b>100.00</b> | <b>4634</b>     | <b>100.00</b> | <b>6527</b> | <b>100.00</b> |

Source: Fundação Sistema Estadual de Análise de Dados - SEADE

Rubrics and codes of the International Classification of Diseases, Injuries and Causes of Death, Ninth Revision (1985 a 1995)

Rubrics and codes of the International Statistical Classification of Diseases and Related Health Problems, Tenth Revision (1996 a 2004)
